# Supplementary material
Source: PubMed Central journal article supplement (PMC4009496)

45. K. Hoebe, E. Janssen, B. Beutler, *Nature Immunol.* **2004**, 5, 971.
46. A. Rot, H.V. Andrain, *Ann. Rev. Immunol.* **2004**, 22, 891.
47. G. Penna, M. Vulcano, S. Sozzani, L. Adorini, *Hum. Immunol.* **2002**, 63, 1164.
48. T. Korn, E. Bellelli, M. Oukka, V.K. Kuchroo, *Ann. Rev. Immunol.* **2009**, 27, 485.
49. E. Bettelli, T. Korn, V.K. Kuchroo, *Curr. Opin. Immunol.* **2007**, 19, 652.
50. F. Katou, H. Ohtani, T. Nakayama, H. Nagura, O. Yoshie, K. Motegi, *J. Pathol.* **2003**, 199, 98.
51. M. del Pilar Martin, W.C. Weldon, V.G. Zarnitsyn, D.G. Koutsonanos, H. Akbari, I. Skountzou, J. Jacob, M.R. Prausnitz, R.W. Compans, *MBio*, **2012**, 3, e00012-12.
52. F.S. Quan, D.G. Yoo, J.M. Song, J.D. Clements, R.W. Compans, S.M. Kang, *J. Virol.* **2009**, 83, 4489.
53. K.W. Ng, M. Pearton, S. Coulman, A. Anstey, C Gateley, A. Morrissey, C. Allender, J. Birchall, *Vaccine* **2009**, 27, 5948.

## Supporting Information

**Supp 1.** Ontology terms over-represented for probes up-regulated following delivery of VLPs via both intradermal injection (A) and microneedle coating (B).

A) Ontological terms returned in ID VLP treated samples.

| P value              | ExpCount          | Count | Size | Term                                                                                |
|----------------------|-------------------|-------|------|-------------------------------------------------------------------------------------|
| 1.05551816299702e-31 | 1.36089348224704  | 28    | 52   | "response to type I interferon"                                                     |
| 3.17225946942622e-31 | 0.89518555667001  | 24    | 35   | "type I interferon-mediated signaling pathway"                                      |
| 2.11886225968669e-19 | 1.93665610935156  | 23    | 74   | "response to interferon-gamma"                                                      |
| 1.63075225420868e-18 | 5.13221601489758  | 33    | 212  | "response to biotic stimulus"                                                       |
| 2.33989970240346e-18 | 36.5226164452665  | 86    | 1448 | "response to stress"                                                                |
| 2.44583730246191e-18 | 11.7142142142142  | 48    | 453  | "cellular response to organic substance"                                            |
| 2.08651130395234e-17 | 2.06673407482305  | 22    | 84   | "response to virus"                                                                 |
| 1.14423653792327e-16 | 1.51791965327555  | 19    | 58   | "interferon-gamma-mediated signaling pathway"                                       |
| 2.86207292046326e-12 | 6.43603730424072  | 29    | 288  | "multi-organism process"                                                            |
| 7.14414814458927e-11 | 31.2309791879904  | 66    | 1237 | "response to chemical stimulus"                                                     |
| 6.32860634990614e-09 | 35.2078711985689  | 66    | 1491 | "signal transduction"                                                               |
| 1.27833847271265e-08 | 7.38023003833972  | 26    | 282  | "interspecies interaction between organisms"                                        |
| 3.66824741733634e-07 | 0.732788798133022 | 8     | 28   | "negative regulation of reproductive process"                                       |
| 7.35104440864723e-07 | 1.7011168528088   | 11    | 65   | "defense response to virus"                                                         |
| 9.50880942109342e-07 | 4.26587764627438  | 17    | 163  | "response to bacterium"                                                             |
| 7.43048272154196e-06 | 2.5573653123322   | 12    | 152  | "immune response"                                                                   |
| 7.86657484376521e-06 | 0.314052342057009 | 5     | 12   | "cellular extravasation"                                                            |
| 1.11577961155477e-05 | 2.22453742290382  | 11    | 85   | "positive regulation of I-kappaB kinase/NF-kappaB cascade"                          |
| 2.05160379141694e-05 | 2.36804278789905  | 11    | 92   | "regulation of immune effector process"                                             |
| 2.17146387662664e-05 | 2.38086303939962  | 11    | 99   | "regulation of defense response"                                                    |
| 6.39538183327817e-05 | 18.7122853808968  | 36    | 715  | "regulation of cell death"                                                          |
| 6.75173324421921e-05 | 3.16669444907485  | 12    | 121  | "cellular response to external stimulus"                                            |
| 6.90159067432299e-05 | 0.104684114019003 | 3     | 4    | "positive regulation of defense response to virus by host"                          |
| 6.90159067432299e-05 | 0.104684114019003 | 3     | 4    | "negative regulation of transposition"                                              |
| 6.90159067432299e-05 | 0.104684114019003 | 3     | 4    | "base conversion or substitution editing"                                           |
| 6.90159067432299e-05 | 0.104684114019003 | 3     | 4    | "antigen processing and presentation of endogenous peptide antigen via MHC class I" |
| 6.90159067432299e-05 | 0.104684114019003 | 3     | 4    | "ISG15-protein conjugation"                                                         |
| 6.90159067432299e-05 | 0.104684114019003 | 3     | 4    | "cellular response to interferon-alpha"                                             |
| 7.93934366868755e-05 | 2.2736683920521   | 10    | 89   | "antigen processing and presentation"                                               |
| 8.52054118027929e-05 | 18.2150358393066  | 35    | 696  | "regulation of apoptosis"                                                           |
| 0.000129921886483149 | 0.523420570095016 | 5     | 20   | "negative regulation of type I interferon production"                               |
| 0.000131238625329093 | 1.96282713785631  | 9     | 75   | "cellular response to nutrient levels"                                              |

|                      |                    |    |      |                                                                                                                             |
|----------------------|--------------------|----|------|-----------------------------------------------------------------------------------------------------------------------------|
| 0.000144633047753912 | 1.17769628271379   | 7  | 45   | "cellular response to lipopolysaccharide"                                                                                   |
| 0.000144785420274864 | 1.55624568668047   | 8  | 82   | "innate immune response"                                                                                                    |
| 0.000166890061478867 | 1.20386731121854   | 7  | 46   | "regulation of response to biotic stimulus"                                                                                 |
| 0.000223458050318803 | 3.58543090515086   | 12 | 137  | "positive regulation of cell activation"                                                                                    |
| 0.000250782781920773 | 1.28238039673279   | 7  | 49   | "regulation of response to cytokine stimulus"                                                                               |
| 0.000268481348667109 | 0.34022337056176   | 4  | 13   | "negative regulation of viral reproduction"                                                                                 |
| 0.000275892651783996 | 3.1405234205701    | 11 | 120  | "positive regulation of lymphocyte activation"                                                                              |
| 0.00028528553416248  | 1.30855142523754   | 7  | 50   | "positive regulation of NF-kappaB transcription factor activity"                                                            |
| 0.000323504612282877 | 1.33472245374229   | 7  | 51   | "activation of caspase activity"                                                                                            |
| 0.000331936211691021 | 0.157026171028505  | 3  | 6    | "antigen processing and presentation of endogenous antigen"                                                                 |
| 0.000331936211691021 | 0.157026171028505  | 3  | 6    | "negative regulation of innate immune response"                                                                             |
| 0.000365727226652022 | 1.36089348224704   | 7  | 52   | "cellular response to biotic stimulus"                                                                                      |
| 0.000402918782793961 | 0.99449908318053   | 6  | 38   | "positive regulation of leukocyte migration"                                                                                |
| 0.000483259037405943 | 1.85814302383731   | 8  | 71   | "adaptive immune response based on somatic recombination of immune receptors built from immunoglobulin superfamily domains" |
| 0.00057199742616673  | 24.0773462243707   | 40 | 920  | "death"                                                                                                                     |
| 0.000615109054882042 | 1.07301216869478   | 6  | 41   | "positive regulation of inflammatory response"                                                                              |
| 0.0006281094980655   | 3.4545757626271    | 11 | 132  | "regulation of endopeptidase activity"                                                                                      |
| 0.00064269797821129  | 0.418736456076013  | 4  | 16   | "positive regulation of cell-cell adhesion"                                                                                 |
| 0.000680673632334299 | 0.0523420570095016 | 2  | 2    | "virus-infected cell apoptosis"                                                                                             |
| 0.000680673632334299 | 0.0523420570095016 | 2  | 2    | "regulation of lung blood pressure"                                                                                         |
| 0.000680673632334299 | 0.0523420570095016 | 2  | 2    | "negative regulation of retroviral genome replication"                                                                      |
| 0.000680673632334299 | 0.0523420570095016 | 2  | 2    | "cytosol to ER transport"                                                                                                   |
| 0.000729092469077753 | 26.4212493326215   | 40 | 1394 | "regulation of biological process"                                                                                          |
| 0.000731679882988034 | 1.1068026073876    | 6  | 43   | "regulation of multi-organism process"                                                                                      |
| 0.000823447124057217 | 0.444907484580763  | 4  | 17   | "negative regulation of DNA binding"                                                                                        |
| 0.000823447124057217 | 0.444907484580763  | 4  | 17   | "regulation of type I interferon-mediated signaling pathway"                                                                |
| 0.000846752265617433 | 0.205504587155963  | 3  | 8    | "regulation of defense response to virus by host"                                                                           |
| 0.000885957123043252 | 5.36506084347391   | 14 | 205  | "response to extracellular stimulus"                                                                                        |
| 0.00089410534344727  | 0.209368228038006  | 3  | 8    | "T cell migration"                                                                                                          |
| 0.000951834356107446 | 14.4202367061177   | 27 | 551  | "positive regulation of molecular function"                                                                                 |
| 0.000966571020504442 | 0.785130855142524  | 5  | 30   | "regulation of JAK-STAT cascade"                                                                                            |
| 0.000966571020504442 | 0.785130855142524  | 5  | 30   | "positive regulation of smooth muscle cell proliferation"                                                                   |
| 0.000966571020504442 | 0.785130855142524  | 5  | 30   | "cellular response to tumor necrosis factor"                                                                                |
| 0.000979509450658865 | 1.5964327387898    | 7  | 61   | "muscle cell proliferation"                                                                                                 |
| 0.0010366858054492   | 4.8407183618664    | 13 | 191  | "inflammatory response"                                                                                                     |
| 0.00104236284758973  | 6.08611157647847   | 15 | 239  | "regulation of intracellular protein kinase cascade"                                                                        |
| 0.00104915597835731  | 1.60851926977688   | 7  | 78   | "cytokine-mediated signaling pathway"                                                                                       |
| 0.00118045773544368  | 8.1391898649775    | 18 | 311  | "positive regulation of signal transduction"                                                                                |
| 0.00118911101576695  | 1.6487747957993    | 7  | 63   | "positive regulation of peptidase activity"                                                                                 |
| 0.00130631563473751  | 1.67494582430405   | 7  | 64   | "lymphocyte mediated immunity"                                                                                              |
| 0.00135087920422971  | 8.92432072012002   | 19 | 341  | "negative regulation of molecular function"                                                                                 |
| 0.00136002192437279  | 7.56342723787298   | 17 | 289  | "negative regulation of cell proliferation"                                                                                 |
| 0.0014611066389927   | 2.70918367346939   | 9  | 135  | "response to cytokine stimulus"                                                                                             |
| 0.00148470583248085  | 4.42290381730288   | 12 | 169  | "regulation of response to external stimulus"                                                                               |
| 0.00153816946126614  | 1.72110091743119   | 7  | 67   | "antigen processing and presentation of peptide antigen via MHC class I"                                                    |
| 0.00164238643903355  | 4.47524587431239   | 12 | 171  | "regulation of leukocyte activation"                                                                                        |
| 0.00173085434285566  | 2.25070845140857   | 8  | 86   | "signal transduction by p53 class mediator"                                                                                 |
| 0.00180086837130864  | 1.30830779707184   | 6  | 53   | "regulation of cytokine production"                                                                                         |
| 0.00181307472921148  | 3.3498916486081    | 10 | 128  | "regulation of cell adhesion"                                                                                               |
| 0.00190847806553109  | 0.549591598599767  | 4  | 21   | "cellular response to interleukin-1"                                                                                        |
| 0.00199724719531623  | 2.30108423686405   | 8  | 89   | "positive regulation of cytokine production"                                                                                |
| 0.00200683516646702  | 0.0785130855142524 | 2  | 3    | "cytidine deamination"                                                                                                      |
| 0.00200683516646702  | 0.0785130855142524 | 2  | 3    | "mRNA modification"                                                                                                         |
| 0.00200683516646702  | 0.0785130855142524 | 2  | 3    | "positive regulation of interferon-alpha production"                                                                        |
| 0.00200683516646702  | 0.0785130855142524 | 2  | 3    | "cytidine metabolic process"                                                                                                |
| 0.00200683516646702  | 0.0785130855142524 | 2  | 3    | "pyrimidine ribonucleoside catabolic process"                                                                               |
| 0.00200683516646702  | 0.0785130855142524 | 2  | 3    | "response to high density lipoprotein particle stimulus"                                                                    |
| 0.00201182170617183  | 2.8363453815261    | 9  | 113  | "regulation of innate immune response"                                                                                      |
| 0.00228558023846022  | 0.575762627104517  | 4  | 22   | "regulation of viral genome replication"                                                                                    |
| 0.00244872992065252  | 9.39539923320553   | 19 | 359  | "positive regulation of programmed cell death"                                                                              |
| 0.00248614085511463  | 0.287881313552259  | 3  | 11   | "negative regulation of leukocyte apoptosis"                                                                                |

|                     |                   |    |      |                                                                                                 |
|---------------------|-------------------|----|------|-------------------------------------------------------------------------------------------------|
| 0.0026398083786197  | 1.40704127644814  | 6  | 61   | "regulation of immune response"                                                                 |
| 0.00266063350154356 | 2.40773462243707  | 8  | 92   | "regulation of cysteine-type endopeptidase activity involved in apoptotic process"              |
| 0.00267143297703471 | 1.41323553925654  | 6  | 54   | "cytokine metabolic process"                                                                    |
| 0.00286917231339331 | 42.8681446907818  | 59 | 1638 | "positive regulation of biological process"                                                     |
| 0.00287709876567464 | 0.99449908318053  | 5  | 38   | "regulation of leukocyte chemotaxis"                                                            |
| 0.00287709876567464 | 0.99449908318053  | 5  | 38   | "response to heat"                                                                              |
| 0.0030021898635439  | 4.18736456076013  | 11 | 160  | "regulation of sequence-specific DNA binding transcription factor activity"                     |
| 0.00318780807600143 | 0.628104684114019 | 4  | 24   | "acute-phase response"                                                                          |
| 0.00318780807600143 | 0.628104684114019 | 4  | 24   | "response to dsRNA"                                                                             |
| 0.00321742934537244 | 1.46557759626604  | 6  | 56   | "DNA damage response, signal transduction by p53 class mediator resulting in cell cycle arrest" |
| 0.00321742934537244 | 1.46557759626604  | 6  | 56   | "signal transduction involved in G1/S transition checkpoint"                                    |
| 0.00321742934537244 | 1.46557759626604  | 6  | 56   | "signal transduction involved in DNA damage checkpoint"                                         |
| 0.00321742934537244 | 1.46557759626604  | 6  | 56   | "signal transduction involved in mitotic cell cycle G1/S checkpoint"                            |
| 0.00325161375595645 | 0.314052342057009 | 3  | 12   | "interleukin-1 beta secretion"                                                                  |
| 0.00350805833555336 | 3.66394399066511  | 10 | 140  | "immune response-regulating signaling pathway"                                                  |
| 0.00351973507789521 | 1.4917486247708   | 6  | 57   | "response to ionizing radiation"                                                                |
| 0.00370867966625331 | 2.00507614213198  | 7  | 79   | "activation of immune response"                                                                 |
| 0.00381693460893048 | 33.6739606126915  | 48 | 1399 | "negative regulation of biological process"                                                     |
| 0.00384268769787308 | 1.51791965327555  | 6  | 58   | "mitotic cell cycle G1/S transition DNA damage checkpoint"                                      |
| 0.00384999524562686 | 0.103402268178786 | 2  | 4    | "pyrimidine nucleoside catabolic process"                                                       |
| 0.00394465442619082 | 0.104684114019003 | 2  | 4    | "folic acid-containing compound biosynthetic process"                                           |
| 0.00394465442619082 | 0.104684114019003 | 2  | 4    | "intracellular transport of viral proteins in host cell"                                        |
| 0.00394465442619082 | 0.104684114019003 | 2  | 4    | "positive regulation of interleukin-17 production"                                              |
| 0.00394465442619082 | 0.104684114019003 | 2  | 4    | "positive regulation of natural killer cell differentiation"                                    |
| 0.00394465442619082 | 0.104684114019003 | 2  | 4    | "negative regulation of vasoconstriction"                                                       |
| 0.00394465442619082 | 0.104684114019003 | 2  | 4    | "tetrahydrofolate metabolic process"                                                            |
| 0.00394465442619082 | 0.104684114019003 | 2  | 4    | "intracellular protein transport in other organism involved in symbiotic interaction"           |
| 0.00414655347814325 | 0.34022337056176  | 3  | 13   | "regulation of lymphocyte apoptosis"                                                            |
| 0.00430658804009709 | 0.680446741123521 | 4  | 26   | "activation of pro-apoptotic gene products"                                                     |
| 0.00436174065923562 | 6.35955992665444  | 14 | 243  | "hemopoietic or lymphoid organ development"                                                     |
| 0.00505085636012617 | 2.11985330888481  | 7  | 81   | "immune response-activating cell surface receptor signaling pathway"                            |
| 0.00535776624943953 | 1.62260376729455  | 6  | 62   | "regulation of peptidyl-tyrosine phosphorylation"                                               |
| 0.00540375424748574 | 2.14602433738956  | 7  | 82   | "cell chemotaxis"                                                                               |
| 0.00566390211979229 | 0.732788798133022 | 4  | 28   | "positive regulation of endothelial cell migration"                                             |
| 0.00582084284925105 | 5.88848141356893  | 13 | 225  | "proteolysis involved in cellular protein catabolic process"                                    |
| 0.00583142024061152 | 3.32372062010335  | 9  | 127  | "positive regulation of cell motility"                                                          |
| 0.00586187461683331 | 7.98216369394899  | 16 | 305  | "positive regulation of protein metabolic process"                                              |
| 0.0059304544909302  | 4.57992998833139  | 11 | 175  | "T cell activation"                                                                             |
| 0.00616474053577163 | 2.19836639439907  | 7  | 84   | "positive regulation of protein ubiquitination"                                                 |
| 0.00616474053577163 | 2.19836639439907  | 7  | 84   | "DNA integrity checkpoint"                                                                      |
| 0.006348253097834   | 0.392565427571262 | 3  | 15   | "regulation of tyrosine phosphorylation of Stat3 protein"                                       |
| 0.00646161066234027 | 0.130855142523754 | 2  | 5    | "membrane to membrane docking"                                                                  |
| 0.00646161066234027 | 0.130855142523754 | 2  | 5    | "negative regulation of tyrosine phosphorylation of STAT protein"                               |
| 0.00646161066234027 | 0.130855142523754 | 2  | 5    | "regulation of monocyte differentiation"                                                        |
| 0.00646161066234027 | 0.130855142523754 | 2  | 5    | "positive regulation of nitric-oxide synthase biosynthetic process"                             |
| 0.00646161066234027 | 0.130855142523754 | 2  | 5    | "positive regulation of T cell apoptosis"                                                       |
| 0.00646161066234027 | 0.130855142523754 | 2  | 5    | "cellular response to alkaloid"                                                                 |
| 0.00675213610730604 | 1.7011168528088   | 6  | 65   | "cellular response to abiotic stimulus"                                                         |
| 0.00696004486950356 | 15.7811301883647  | 26 | 603  | "regulation of cell communication"                                                              |
| 0.00727057512618364 | 1.72728788131355  | 6  | 66   | "M/G1 transition of mitotic cell cycle"                                                         |
| 0.00727057512618364 | 1.72728788131355  | 6  | 66   | "T cell receptor signaling pathway"                                                             |
| 0.00728263869341243 | 1.23003833972329  | 5  | 47   | "gastrulation"                                                                                  |
| 0.00728263869341243 | 1.23003833972329  | 5  | 47   | "positive regulation of chemotaxis"                                                             |
| 0.00766491966390078 | 0.418736456076013 | 3  | 16   | "regulation of leukocyte mediated cytotoxicity"                                                 |

|                     |                   |    |     |                                                                                            |
|---------------------|-------------------|----|-----|--------------------------------------------------------------------------------------------|
| 0.00766491966390078 | 0.418736456076013 | 3  | 16  | "response to cold"                                                                         |
| 0.00766491966390078 | 0.418736456076013 | 3  | 16  | "negative regulation of homeostatic process"                                               |
| 0.00766491966390078 | 0.418736456076013 | 3  | 16  | "negative regulation of multi-organism process"                                            |
| 0.00781723288888329 | 1.7534589098183   | 6  | 67  | "regulation of lymphocyte proliferation"                                                   |
| 0.00793726271519519 | 8.97666277712952  | 17 | 343 | "anatomical structure formation involved in morphogenesis"                                 |
| 0.00796156722127896 | 1.25620936822804  | 5  | 48  | "regulation of cytokine biosynthetic process"                                              |
| 0.00831829915194578 | 2.90498416402734  | 8  | 111 | "protein polyubiquitination"                                                               |
| 0.00841568305275788 | 2.32922153692282  | 7  | 89  | "activation of innate immune response"                                                     |
| 0.00868329891491603 | 1.28238039673279  | 5  | 49  | "regulation of cellular amino acid metabolic process"                                      |
| 0.00868329891491603 | 1.28238039673279  | 5  | 49  | "positive regulation of mononuclear cell proliferation"                                    |
| 0.00891159075502386 | 4.18736456076013  | 10 | 160 | "negative regulation of cellular protein metabolic process"                                |
| 0.00893016506194354 | 2.35539256542757  | 7  | 90  | "peptidyl-tyrosine modification"                                                           |
| 0.00899851461162767 | 1.8058009668278   | 6  | 69  | "regulation of G1/S transition of mitotic cell cycle"                                      |
| 0.00908432782230865 | 0.833819241982507 | 4  | 34  | "positive regulation of immune response"                                                   |
| 0.00913094949386726 | 0.444907484580763 | 3  | 17  | "leukocyte cell-cell adhesion"                                                             |
| 0.00913094949386726 | 0.444907484580763 | 3  | 17  | "positive regulation of tyrosine phosphorylation of STAT protein"                          |
| 0.00917491381196384 | 0.837472912152025 | 4  | 32  | "positive regulation of T cell proliferation"                                              |
| 0.00917491381196384 | 0.837472912152025 | 4  | 32  | "cellular response to vitamin"                                                             |
| 0.00921053598888425 | 1.81390661740007  | 6  | 72  | "response to lipopolysaccharide"                                                           |
| 0.0092806462698543  | 5.54735422986181  | 12 | 218 | "response to abiotic stimulus"                                                             |
| 0.00944910813107167 | 1.30855142523754  | 5  | 50  | "humoral immune response"                                                                  |
| 0.00945198994561211 | 3.58543090515086  | 9  | 137 | "response to nutrient"                                                                     |
| 0.00952644788766488 | 0.157026171028505 | 2  | 6   | "positive regulation of T cell mediated cytotoxicity"                                      |
| 0.00952644788766488 | 0.157026171028505 | 2  | 6   | "positive regulation of antigen processing and presentation"                               |
| 0.00952644788766488 | 0.157026171028505 | 2  | 6   | "positive regulation of macrophage chemotaxis"                                             |
| 0.00952644788766488 | 0.157026171028505 | 2  | 6   | "interleukin-6 biosynthetic process"                                                       |
| 0.00952644788766488 | 0.157026171028505 | 2  | 6   | "activation of JAK2 kinase activity"                                                       |
| 0.00952644788766488 | 0.157026171028505 | 2  | 6   | "type I interferon biosynthetic process"                                                   |
| 0.00952644788766488 | 0.157026171028505 | 2  | 6   | "positive regulation of myeloid leukocyte cytokine production involved in immune response" |
| 0.00963477641974489 | 1.83197199533256  | 6  | 70  | "negative regulation of protein ubiquitination"                                            |
| 0.00970982078305703 | 2.98349724954159  | 8  | 114 | "cellular aromatic compound metabolic process"                                             |
| 0.00970982078305703 | 2.98349724954159  | 8  | 114 | "myeloid cell differentiation"                                                             |
| 0.0096224848072007  | 0.45813797722706  | 3  | 18  | "JAK-STAT cascade"                                                                         |

## B) Ontological terms returned in MN VLP treated samples.

| P value              | ExpCount           | Count | Size | Term                                                       |
|----------------------|--------------------|-------|------|------------------------------------------------------------|
| 8.1728589990729e-29  | 0.841467519353753  | 23    | 50   | "response to type I interferon"                            |
| 8.1728589990729e-29  | 0.841467519353753  | 23    | 50   | "type I interferon-mediated signaling pathway"             |
| 5.25592362853017e-16 | 24.9242679232582   | 63    | 1481 | "response to stress"                                       |
| 5.85061257183293e-16 | 7.33462445267767   | 35    | 449  | "cellular response to organic substance"                   |
| 1.73909746070792e-15 | 1.24115646258503   | 17    | 82   | "response to virus"                                        |
| 1.39254066429347e-11 | 1.26220127903063   | 14    | 75   | "response to interferon-gamma"                             |
| 4.54704283796624e-11 | 22.9384045775833   | 53    | 1363 | "response to chemical stimulus"                            |
| 1.53585655963251e-10 | 0.992931672837428  | 12    | 59   | "interferon-gamma-mediated signaling pathway"              |
| 4.38496452037803e-09 | 1.04341972399865   | 11    | 62   | "defense response to virus"                                |
| 8.2279500624069e-08  | 31.3699091215079   | 57    | 1864 | "signal transduction"                                      |
| 9.59566220095974e-08 | 2.1065881092662    | 13    | 207  | "immune response"                                          |
| 7.04364314901488e-07 | 4.71221810838102   | 18    | 280  | "interspecies interaction between organisms"               |
| 8.63134328674985e-07 | 2.89464826657691   | 14    | 172  | "regulation of cytokine production"                        |
| 2.54787568937141e-06 | 0.639515314708852  | 7     | 38   | "positive regulation of leukocyte migration"               |
| 2.54787568937141e-06 | 0.639515314708852  | 7     | 38   | "regulation of leukocyte chemotaxis"                       |
| 2.55739510364676e-06 | 0.901253918495298  | 8     | 75   | "innate immune response"                                   |
| 9.679107085709e-06   | 0.774150117805453  | 7     | 46   | "positive regulation of chemotaxis"                        |
| 1.82805752844762e-05 | 0.0673174015483002 | 3     | 4    | "positive regulation of defense response to virus by host" |
| 1.82805752844762e-05 | 0.0673174015483002 | 3     | 4    | "ISG15-protein conjugation"                                |
| 1.82805752844762e-05 | 0.0673174015483002 | 3     | 4    | "cellular response to interferon-alpha"                    |
| 1.82805752844762e-05 | 0.0673174015483002 | 3     | 4    | "cellular response to ethanol"                             |

|                       |                    |    |      |                                                                                     |
|-----------------------|--------------------|----|------|-------------------------------------------------------------------------------------|
| 3.37118290501228e-05  | 0.201952204644901  | 4  | 12   | "cellular extravasation"                                                            |
| 3.37118290501228e-05  | 0.201952204644901  | 4  | 12   | "regulation of T-helper cell differentiation"                                       |
| 3.92885674802161e-05  | 3.00948670167711   | 12 | 187  | "inflammatory response"                                                             |
| 4.03482120058871e-05  | 63.5812857623696   | 82 | 3778 | "biological regulation"                                                             |
| 5.67299802764391e-05  | 1.36317738135308   | 8  | 81   | "cell chemotaxis"                                                                   |
| 7.19784306325954e-05  | 0.723662066644227  | 6  | 43   | "humoral immune response"                                                           |
| 7.64187485596404e-05  | 0.727272727272727  | 6  | 59   | "cytokine-mediated signaling pathway"                                               |
| 7.91974084114462e-05  | 1.06024907438573   | 7  | 63   | "regulation of behavior"                                                            |
| 8.22187515080183e-05  | 0.740491417031303  | 6  | 44   | "regulation of response to biotic stimulus"                                         |
| 8.91796066754184e-05  | 0.10097610232245   | 3  | 6    | "positive regulation of T cell mediated cytotoxicity"                               |
| 8.94154103343077e-05  | 0.252440255806126  | 4  | 15   | "alpha-beta T cell activation involved in immune response"                          |
| 8.94154103343077e-05  | 0.252440255806126  | 4  | 15   | "T cell differentiation involved in immune response"                                |
| 8.94154103343077e-05  | 0.252440255806126  | 4  | 15   | "CD4-positive, alpha-beta T cell differentiation involved in immune response"       |
| 0.000104092468802558  | 1.10575951498821   | 7  | 67   | "antigen processing and presentation of peptide antigen via MHC class I"            |
| 0.000114709476143651  | 1.50464716006885   | 8  | 94   | "regulation of defense response"                                                    |
| 0.00011513503586975   | 2.37293840457758   | 10 | 141  | "negative regulation of multicellular organismal process"                           |
| 0.000117685638750279  | 0.269269606193201  | 4  | 16   | "regulation of CD4-positive, alpha-beta T cell activation"                          |
| 0.000135372612234818  | 0.807808818579603  | 6  | 48   | "positive regulation of mononuclear cell proliferation"                             |
| 0.000142223737582394  | 1.16122517670818   | 7  | 69   | "regulation of leukocyte proliferation"                                             |
| 0.00017060285282038   | 0.841467519353753  | 6  | 50   | "positive regulation of immune effector process"                                    |
| 0.000190743979550798  | 0.858296869740828  | 6  | 51   | "cellular response to biotic stimulus"                                              |
| 0.000280441960666627  | 0.0336587007741501 | 2  | 2    | "positive regulation of activation of JAK2 kinase activity"                         |
| 0.000280441960666627  | 0.0336587007741501 | 2  | 2    | "cytosol to ER transport"                                                           |
| 0.00029082518841582   | 0.925614271289128  | 6  | 55   | "regulation of multi-organism process"                                              |
| 0.000297481322858606  | 0.336587007741501  | 4  | 20   | "negative regulation of type I interferon production"                               |
| 0.000362756075742985  | 0.353416358128576  | 4  | 21   | "positive regulation of adaptive immune response"                                   |
| 0.00043729347551827   | 2.79367216425446   | 10 | 166  | "regulation of response to external stimulus"                                       |
| 0.000446512575031918  | 0.656344665095927  | 5  | 39   | "positive regulation of inflammatory response"                                      |
| 0.000523017002581916  | 0.387075058902726  | 4  | 23   | "regulation of alpha-beta T cell differentiation"                                   |
| 0.000541817405270639  | 1.43897505057316   | 7  | 88   | "antigen processing and presentation"                                               |
| 0.0005424285836258668 | 1.88302713635597   | 8  | 114  | "response to molecule of bacterial origin"                                          |
| 0.000565190617242454  | 5.78929653315382   | 15 | 344  | "taxis"                                                                             |
| 0.000591786328006129  | 2.38976775496466   | 9  | 142  | "leukocyte differentiation"                                                         |
| 0.000638605960059213  | 4.03904409289801   | 12 | 240  | "hemopoietic or lymphoid organ development"                                         |
| 0.000677122127963248  | 0.412735849056604  | 4  | 25   | "positive regulation of T cell proliferation"                                       |
| 0.000691910291634518  | 0.185122854257826  | 3  | 11   | "positive regulation of neutrophil chemotaxis"                                      |
| 0.000723665987649947  | 1.09390777515988   | 6  | 65   | "regulation of lymphocyte proliferation"                                            |
| 0.000832072241546909  | 0.0504880511612252 | 2  | 3    | "regulation of activation of Janus kinase activity"                                 |
| 0.000832072241546909  | 0.0504880511612252 | 2  | 3    | "mRNA modification"                                                                 |
| 0.000911309779162648  | 0.201952204644901  | 3  | 12   | "negative regulation of viral genome replication"                                   |
| 0.000920806463289846  | 1.1443958263211    | 6  | 68   | "negative regulation of protein ubiquitination"                                     |
| 0.000928420732840305  | 0.766434516731782  | 5  | 48   | "regulation of immune effector process"                                             |
| 0.000968609022246067  | 0.774150117805453  | 5  | 46   | "regulation of lymphocyte differentiation"                                          |
| 0.00104780377821144   | 11.7637159205655   | 23 | 699  | "regulation of cell death"                                                          |
| 0.00112972804276114   | 2.10366879838438   | 8  | 125  | "positive regulation of cell motility"                                              |
| 0.00113380137509964   | 0.471221810838102  | 4  | 28   | "positive regulation of smooth muscle cell proliferation"                           |
| 0.00117028257054577   | 0.218781555031976  | 3  | 13   | "monocyte chemotaxis"                                                               |
| 0.00117028257054577   | 0.218781555031976  | 3  | 13   | "positive regulation of CD4-positive, alpha-beta T cell differentiation"            |
| 0.00142574923758399   | 8.38101649276338   | 18 | 498  | "positive regulation of response to stimulus"                                       |
| 0.00147895537783291   | 0.504880511612252  | 4  | 30   | "positive regulation of T cell differentiation"                                     |
| 0.00157134845612376   | 1.72611245256985   | 7  | 139  | "response to other organism"                                                        |
| 0.00164586390780934   | 0.0673174015483002 | 2  | 4    | "positive regulation of T-helper 1 type immune response"                            |
| 0.00164586390780934   | 0.0673174015483002 | 2  | 4    | "base conversion or substitution editing"                                           |
| 0.00164586390780934   | 0.0673174015483002 | 2  | 4    | "intracellular transport of viral proteins in host cell"                            |
| 0.00164586390780934   | 0.0673174015483002 | 2  | 4    | "antigen processing and presentation of endogenous peptide antigen via MHC class I" |
| 0.00164586390780934   | 0.0673174015483002 | 2  | 4    | "negative regulation of interleukin-2 production"                                   |
| 0.00164586390780934   | 0.0673174015483002 | 2  | 4    | "regulation of tyrosine phosphorylation of Stat1 protein"                           |
| 0.00164586390780934   | 0.0673174015483002 | 2  | 4    | "regulation of retroviral genome replication"                                       |
| 0.00164586390780934   | 0.0673174015483002 | 2  | 4    | "positive regulation of T-helper 1 cell differentiation"                            |

|                                                                                                                 |                    |    |     |                                                                   |
|-----------------------------------------------------------------------------------------------------------------|--------------------|----|-----|-------------------------------------------------------------------|
| 0.00164586390780934<br>in symbiotic interaction"                                                                | 0.0673174015483002 | 2  | 4   | "intracellular protein transport in other organism involved       |
| 0.00165074978993574                                                                                             | 1.2790306294177    | 6  | 76  | "regulation of angiogenesis"                                      |
| 0.00171961845547895                                                                                             | 11.443958263211    | 22 | 680 | "regulation of apoptosis"                                         |
| 0.00181681380024626                                                                                             | 0.252440255806126  | 3  | 15  | "positive regulation of cell killing"                             |
| 0.00181681380024626                                                                                             | 0.252440255806126  | 3  | 15  | "positive regulation of transmission of nerve impulse"            |
| 0.00185358482777821                                                                                             | 2.27196230225513   | 8  | 135 | "positive regulation of cell activation"                          |
| 0.00187346571390416                                                                                             | 2.81050151464153   | 9  | 167 | "regulation of leukocyte activation"                              |
| 0.00203576902056065                                                                                             | 0.261720067453626  | 3  | 16  | "viral genome replication"                                        |
| 0.00220892029905302                                                                                             | 0.269269606193201  | 3  | 16  | "regulation of leukocyte mediated cytotoxicity"                   |
| 0.00220892029905302                                                                                             | 0.269269606193201  | 3  | 16  | "regulation of T cell mediated immunity"                          |
| 0.00220892029905302                                                                                             | 0.269269606193201  | 3  | 16  | "negative regulation of homeostatic process"                      |
| 0.00220892029905302                                                                                             | 0.269269606193201  | 3  | 16  | "positive regulation of tyrosine phosphorylation of STAT protein" |
| 0.00220892029905302                                                                                             | 0.269269606193201  | 3  | 16  | "sequestering of metal ion"                                       |
| 0.00236405814877226<br>class mediator resulting in cell cycle arrest"                                           | 0.942443621676203  | 5  | 56  | "DNA damage response, signal transduction by p53                  |
| 0.00236405814877226<br>checkpoint"                                                                              | 0.942443621676203  | 5  | 56  | "signal transduction involved in G1/S transition                  |
| 0.00236405814877226<br>checkpoint"                                                                              | 0.942443621676203  | 5  | 56  | "signal transduction involved in DNA damage                       |
| 0.00236405814877226<br>checkpoint"                                                                              | 0.942443621676203  | 5  | 56  | "signal transduction involved in mitotic cell cycle G1/S          |
| 0.00251942505552734                                                                                             | 1.86805789296533   | 7  | 111 | "I-kappaB kinase/NF-kappaB cascade"                               |
| 0.00255730337929849                                                                                             | 0.959272972063278  | 5  | 57  | "muscle cell proliferation"                                       |
| 0.0026497069113754                                                                                              | 0.286098956580276  | 3  | 17  | "positive regulation of tumor necrosis factor production"         |
| 0.00279732893977452                                                                                             | 1.90932420872541   | 7  | 155 | "response to cytokine stimulus"                                   |
| 0.00292770877914254                                                                                             | 3.58465163244699   | 10 | 213 | "blood vessel morphogenesis"                                      |
| 0.00294290632124485                                                                                             | 0.605856613934702  | 4  | 36  | "positive regulation of ERK1 and ERK2 cascade"                    |
| 0.00297785344527944<br>checkpoint"                                                                              | 0.992931672837428  | 5  | 59  | "mitotic cell cycle G1/S transition DNA damage                    |
| 0.00314108665148738                                                                                             | 0.302928306967351  | 3  | 18  | "lipopolysaccharide-mediated signaling pathway"                   |
| 0.00314108665148738                                                                                             | 0.302928306967351  | 3  | 18  | "positive regulation of nitric oxide biosynthetic process"        |
| 0.0032242849614977                                                                                              | 0.305053236437384  | 3  | 19  | "JAK-STAT cascade"                                                |
| 0.00325754142820094                                                                                             | 0.622685964321777  | 4  | 37  | "lymphocyte activation involved in immune response"               |
| 0.00328738033279385<br>involved in apoptotic process"                                                           | 1.46415348367553   | 6  | 87  | "regulation of cysteine-type endopeptidase activity               |
| 0.00328738033279385                                                                                             | 1.46415348367553   | 6  | 87  | "signal transduction by p53 class mediator"                       |
| 0.00332606079123905                                                                                             | 4.89734096263884   | 12 | 291 | "cellular homeostasis"                                            |
| 0.00340602458854629<br>somatic recombination of immune receptors built from immunoglobulin superfamily domains" | 0.311002362470469  | 3  | 19  | "regulation of adaptive immune response based on                  |
| 0.00359437196784028                                                                                             | 0.639515314708852  | 4  | 38  | "tumor necrosis factor superfamily cytokine production"           |
| 0.00368243562747705                                                                                             | 1.49781218444968   | 6  | 89  | "peptidyl-tyrosine modification"                                  |
| 0.00369939319301247                                                                                             | 1.04341972399865   | 5  | 62  | "cell activation involved in immune response"                     |
| 0.00402492796170153<br>presentation"                                                                            | 0.10097610232245   | 2  | 6   | "positive regulation of antigen processing and                    |
| 0.00402492796170153                                                                                             | 0.10097610232245   | 2  | 6   | "positive regulation of macrophage chemotaxis"                    |
| 0.00402492796170153<br>antigen"                                                                                 | 0.10097610232245   | 2  | 6   | "antigen processing and presentation of endogenous                |
| 0.00402492796170153                                                                                             | 0.10097610232245   | 2  | 6   | "positive regulation of alpha-beta T cell proliferation"          |
| 0.00427669020646368                                                                                             | 2.05318074722316   | 7  | 122 | "regulation of T cell activation"                                 |
| 0.00493591423529721                                                                                             | 0.353416358128576  | 3  | 21  | "positive regulation of lymphocyte mediated immunity"             |
| 0.00509588542588398<br>process"                                                                                 | 2.67586671154493   | 8  | 159 | "negative regulation of cellular protein metabolic                |
| 0.00516854169314023                                                                                             | 1.12756647593403   | 5  | 67  | "M/G1 transition of mitotic cell cycle"                           |
| 0.00545195694864675                                                                                             | 1.6230303030303    | 6  | 103 | "leukocyte activation"                                            |
| 0.00557323651268821                                                                                             | 0.117805452709525  | 2  | 7   | "positive regulation of fever generation"                         |
| 0.00557323651268821                                                                                             | 0.117805452709525  | 2  | 7   | "regulation of heat generation"                                   |
| 0.00557323651268821                                                                                             | 0.117805452709525  | 2  | 7   | "positive regulation of natural killer cell activation"           |
| 0.00557323651268821                                                                                             | 0.117805452709525  | 2  | 7   | "pyrimidine nucleoside catabolic process"                         |
| 0.00557323651268821                                                                                             | 0.117805452709525  | 2  | 7   | "negative regulation of cytokine secretion"                       |
| 0.00557323651268821                                                                                             | 0.117805452709525  | 2  | 7   | "granulocyte chemotaxis"                                          |
| 0.00557323651268821                                                                                             | 0.117805452709525  | 2  | 7   | "mononuclear cell migration"                                      |
| 0.00563652054091354                                                                                             | 0.723662066644227  | 4  | 43  | "defense response to bacterium"                                   |
| 0.00585806246941256                                                                                             | 1.16122517670818   | 5  | 69  | "regulation of G1/S transition of mitotic cell cycle"             |
| 0.00598662050360493                                                                                             | 3.35428671206565   | 9  | 226 | "regulation of immune system process"                             |

|                     |                   |    |     |                                                           |
|---------------------|-------------------|----|-----|-----------------------------------------------------------|
| 0.0061213668552419  | 0.740491417031303 | 4  | 44  | "regulation of cytokine-mediated signaling pathway"       |
| 0.00641463432290489 | 0.387075058902726 | 3  | 23  | "response to dsRNA"                                       |
| 0.00656671196961834 | 2.22147425109391  | 7  | 132 | "regulation of innate immune response"                    |
| 0.00661012031918812 | 1.19488387748233  | 5  | 71  | "regulation of viral reproduction"                        |
| 0.00665022112142657 | 3.39952877818916  | 9  | 202 | "positive regulation of multicellular organismal process" |
| 0.00674990333354118 | 5.35173342308987  | 12 | 318 | "chemical homeostasis"                                    |
| 0.00692798346199969 | 15.2305621003029  | 25 | 905 | "death"                                                   |
| 0.00693631367167306 | 0.130683731896261 | 2  | 8   | "regulation of defense response to virus by host"         |
| 0.00724250090362364 | 0.403904409289801 | 3  | 24  | "regulation of acute inflammatory response"               |
| 0.00724250090362364 | 0.403904409289801 | 3  | 24  | "positive chemotaxis"                                     |
| 0.00734976948333593 | 0.1346348030966   | 2  | 8   | "positive regulation of interleukin-12 production"        |
| 0.00734976948333593 | 0.1346348030966   | 2  | 8   | "T cell migration"                                        |
| 0.00761531579374539 | 4.10636149444631  | 10 | 244 | "cellular ion homeostasis"                                |
| 0.00813082522075117 | 0.420733759676876 | 3  | 25  | "acute-phase response"                                    |
| 0.00842125849712891 | 0.425725860904794 | 3  | 26  | "cellular response to lipopolysaccharide"                 |
| 0.00860289031618349 | 1.78391114102996  | 6  | 106 | "S phase of mitotic cell cycle"                           |
| 0.00885810007123387 | 0.147316908538643 | 2  | 9   | "tyrosine phosphorylation of STAT protein"                |
| 0.00896296526319692 | 0.824638168966678 | 4  | 49  | "regulation of cellular amino acid metabolic process"     |
| 0.00896296526319692 | 0.824638168966678 | 4  | 49  | "regulation of ion homeostasis"                           |
| 0.00908056611575564 | 0.437563110063952 | 3  | 26  | "virus-host interaction"                                  |
| 0.00934656209091455 | 0.151464153483676 | 2  | 9   | "response to manganese ion"                               |
| 0.00934656209091455 | 0.151464153483676 | 2  | 9   | "response to peptidoglycan"                               |
| 0.00934656209091455 | 0.151464153483676 | 2  | 9   | "positive regulation of osteoclast differentiation"       |
| 0.00939507442337872 | 5.58734432850892  | 12 | 332 | "regulation of hydrolase activity"                        |
| 0.00976879036306726 | 1.83285593934288  | 6  | 111 | "positive regulation of lymphocyte activation"            |
| 0.00987557097906672 | 14.0188488724335  | 23 | 833 | "programmed cell death"                                   |

**Supp 2. Similarity and inter-relationship between predominant ontological terms.** Hierarchical relationship of the top 10 ontology terms up-regulated following ID (A) and microneedle (B) H1N1 VLP delivery. Term comparison charts generated using QuickGO (<http://www.ebi.ac.uk/QuickGO/>). In four independent experiments a single skin donor received four replicate control and four replicate treatment injections.

A

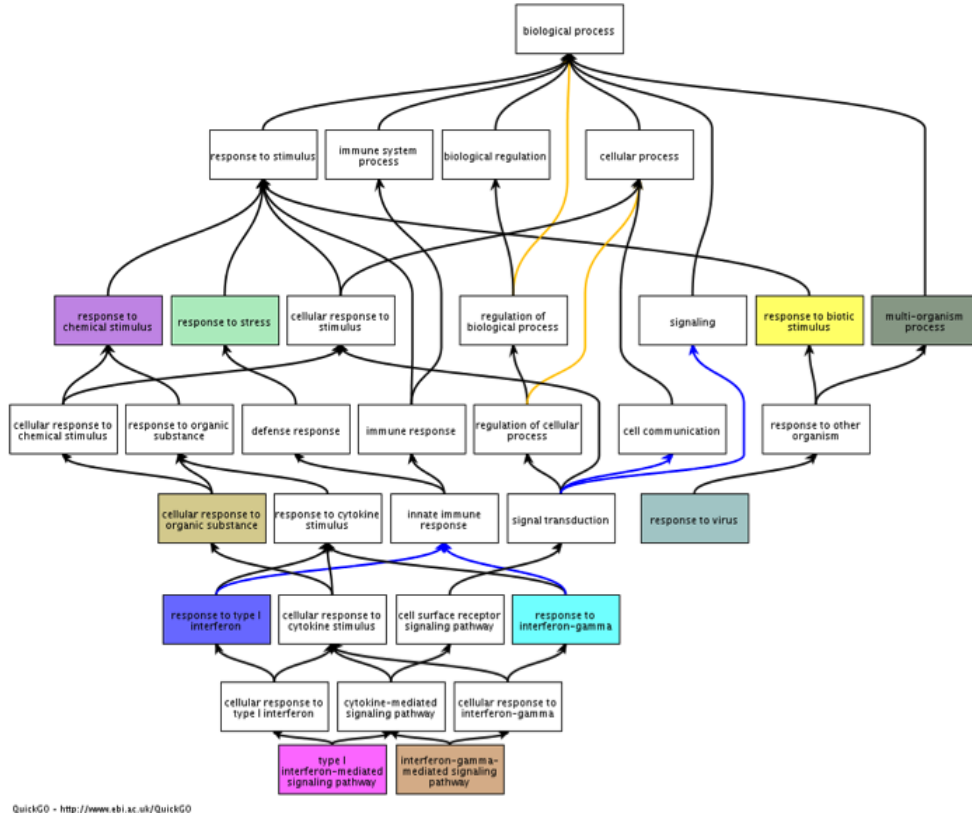

B

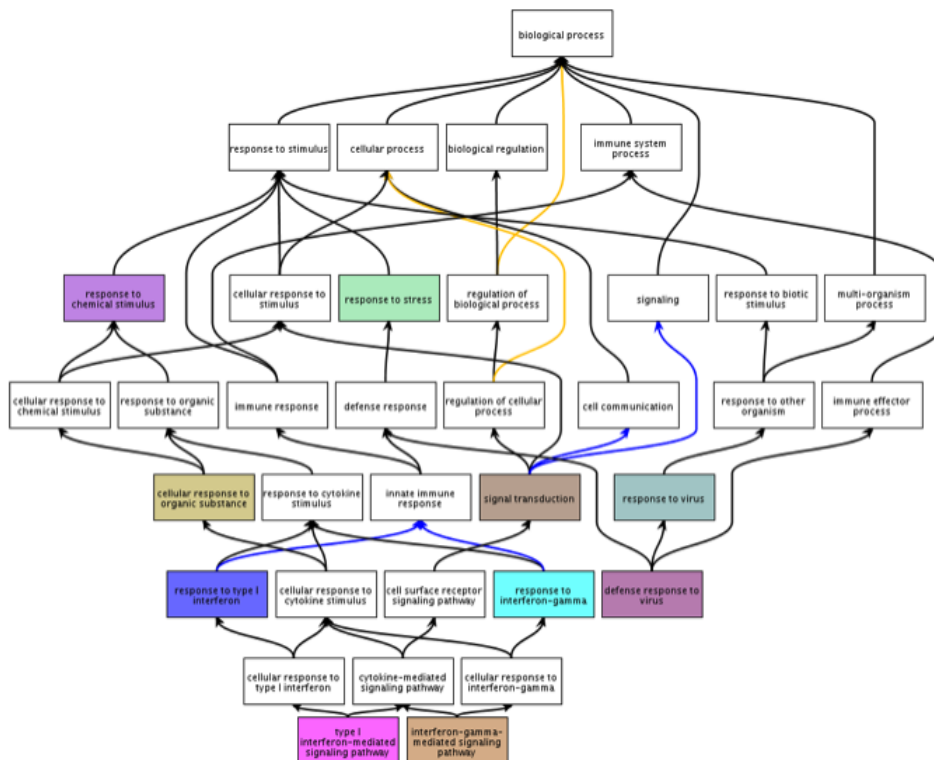

Supplement: NIHMS573232-supplement-01.pdf [file NIHMS573232-supplement-01.pdf]
